# Supplementary material for: Understanding why at-risk population segments do not seek care for tuberculosis: a precision public health approach in South India
Source: PubMed Central journal article supplement — BMJ Glob Health. 2020 Sep 9;5(9):e002555. doi: 10.1136/bmjgh-2020-002555 (PMC7482470; doi:10.1136/bmjgh-2020-002555), 2020-09-09
Supplement: bmjgh-2020-002555supp001.pdf [file bmjgh-2020-002555supp001.pdf]

### Supplement 1: Variables included in predictive models

For each category of variable, we list for each model it was included in.

Continuous variables are marked with an asterisk (\*). All continuous variables were standardized so that the odds ratio reflects the difference in shifting one standard deviation from the mean on that variable.

#### **Demographic variables (included in all models)**

**Gender**

**Age**

**Religion** (coded as Hindu, Christian, Muslim/Other ... non-respondents coded to Hindu)

**Caste** (coded as Scheduled Caste/Scheduled Tribe, Other Backwards Caste, None of the above, or No response)

**Literate** (Can you read and write? Yes/No [This was asked as a joint question, so we can't separate out read and write])

**Years of education\*** (0 = 0-4 years; 1 = 5-9 years; 2 = 10-12 years; 3 = some diploma/college or completed diploma/college)

**Job** (Homemaker; Laborer (Laborer/brick layer, Driver); Professional (Teacher, Owns Business, Private Sector Job, Government Job, Professionals (self-emp)); Other (Student, Housemaid, Other); Not working (retired/unemployed/disabled))

**Wealth score\*** (Based on PCA analysis of assets detailed in Supplement 2. Assets include: Own bike, own scooter, own car, own smartphone, own cellular phone only, own landline, house is private flat, house is housing board apt, house is hut, house is standalone house, house is unit in building, house is other)

**Sample** Original Chennai-representative sample or slum-based booster sample

#### **General Drivers (Included in all models)**

**Pre-existing illness** (Reports currently having: Sugar, BP, heart disease, high cholesterol, arthritis, cancer, pneumonia, malaria, typhoid, malnutrition, HIV/AIDS, TB, other)

**Relative with pre-existing illness** (Reports parents or grandparents having or having had any of the illnesses above)

**Value good health\***

- "I do whatever I can to stay healthy"
- "I get as much information as possible on my medications"
- "Good health is essential for a good life"

(1-5 points for each statement based on answer of Never/Not Often/Half the time/Most of the time/All of the time)

**Smoker** (Y/N – yes if reports smoking 1 or more days in the last week)

**Problem drinker** (Y/N – yes if reports drinking 1 or more days in the last week AND answers yes to either of the following questions: “Do you feel like drinking when you are tired or stressed?” or “Is it hard to stop drinking once you start?”)

**Exercise** (Y/N – yes if reports exercising 1 or more days in the last week)

**Get enough sleep** (Y/N – yes if reports sleeping more than 6 hours/night)

**Worry about healthcare cost\*** (1-5 depending on endorsement of statement “How often do you worry about expenses due to health problems?”)

**Worry about transportation cost\*** (1-5 depending on endorsement of statement “How often do you worry about expenses due to transportation?”)

**General financial stress\*** (1-5 depending on average endorsement of statements “How often do you worry about expenses due to costs of food and household?”, “How often do you worry about expenses due to costs of rent and utilities?”, “How often do you worry about expenses due to general expenditures?”)

**Tendency to delay gratification\*** (-1, 0, or 1, based on response to the following question: Now, I am going to describe two different treatments.

[ show each card and read option]

Treatment X: This treatment will keep you in excellent health for 1 year, and you will feel better right away.

Treatment Y: This treatment will keep you in excellent health for 3 years, but you have to wait 6 months before you feel better.

If you have to choose today, which treatment will you choose?

+1 for Treatment Y, -1 for Treatment X, 0 for no preference)

**Level of perceived family/community care when sick\*** (1 point each for having a spouse who cares for you when you're sick, a parent who cares for you when you're sick, a child who cares for you when you're sick, another family member who cares for you when you're sick, and a non-family member who cares from you when you're sick)

**Family push to seek who care\*** (The total number of people who will urge you to go see a doctor or take medication when you feel sick (from C04) divided by the total number of people who live with you (from C01) plus 5 (for the 5 categories of people who don't live with you who could potentially urge you to seek care asked about in C04))

**Facility preference** (government, private, no difference)

**Facility preference mismatch w/community** – Yes if:

- you think public is better (B01) and those who urge you to seek care when you're sick urge you to go somewhere other than a “government health facility” or “nowhere in particular – they let me choose for myself” (C05), or

- you think private is better (B01) and those who urge you to seek care when you're sick urge you to go somewhere other than "private doctors" or "nowhere in particular – they let me choose for myself" (C05)

Otherwise, No.

**Perceived number of people who help with obligations\***– Based on: "When you have an urgent need, how many people can help you with work or family obligations?". Re-coded to groups for 0, 1, 2, 3-4, or 5+

**Get health info from doctor** -- Y/N for getting health info from doctor

**Get health info from community\***– 1 point each for getting info from family, friends, community elders

**Get health info from govt**– 1 point for getting health info from the government

**Get health info from media\***– 1 point each for getting info from television, newspapers/magazines, billboards, radio, internet

**Aware of TB**– Y/N for having heard of TB

**Other disease knowledge\*** – 1 point each for having heard of the following diseases: malnutrition, HIV/AIDS, pneumonia, malaria, typhoid

#### **TB-specific Drivers (Included in TB knowledge and beliefs model)**

**Believe TB is curable**– Y/N for knowing TB is curable

**Know free TB treatment exists**– Y/N for knowing treatment of TB is available for free in Chennai

**Believe nearby facility tests for TB** – Y/N for reporting there is a facility nearby that tests for TB

**Perceived % in community who will get TB\***– Log of answer to "out of 1,00 people in your area, how many will get TB?"

**Believe more likely to get TB than community**– "Compared to everyone who lives in this area, are you more likely to get TB, less likely to get TB, or about the same?"

**Perceived TB stigma\***-- 1 point for each group of people endorsed for "If a person has TB, would they keep it a secret from their..." (options are family who live with them, family who live elsewhere, friends, neighbours, co-workers)

#### **Symptom-specific Drivers (included in symptom characteristics model)**

**Symptom days\*** – log of # of days since symptom onset for longest-reported symptom (of cough, fever or blood in sputum)

**Symptom recurrence score\*** -- based on the number of times in the past 12 months you've had these symptoms, not counting this time. 0 = 0 times; 1 = 1 time; 2 = 2 times; 3 = 3 times; 4 = 4-5 times; 5 = 6-10 times; 6 = 11+ times

**Symptom Count\*** – 1 point for each symptom reported of: cough, fever, weight loss, blood in sputum

\*Continuous variable. All continuous variables were standardized so that the odds ratio reflects the difference in shifting one standard deviation from the mean on that variable.

### **Supplement 2: Wealth score methodology and variables**

The wealth index is a composite measure of a household's cumulative living standard. The wealth index is calculated using data on a household's ownership of selected assets. We followed the methodology outlined by the Demographic and Health Surveys Program.<sup>1</sup>

We calculated our wealth index based on the following conditions: ownership of phone and type of phone; ownership of bike; ownership of scooter; ownership of car; and living conditions (private flat, unit in housing board apartment, hut, standalone house, unit in building, or other). We discretized variables and then used a Principal Components Analysis to calculate the magnitude of the loadings of the first PCA component for each variable. We estimated the contribution of each variable to the overall wealth index using the following formula: Wealth Index value =  $((1 - \text{mean value})/\text{std.dev}) * \text{component 1 loading score}$ . Values were summed over all wealth index variables to obtain a wealth index score for each variable.

<sup>1</sup><https://www.dhsprogram.com/topics/wealth-index/Wealth-Index-Construction.cfm>

[https://dhsprogram.com/programming/wealth%20index/Steps to constructing the new DHS Wealth Index.pdf](https://dhsprogram.com/programming/wealth%20index/Steps%20to%20constructing%20the%20new%20DHS%20Wealth%20Index.pdf)

### **Supplement 3: Diagram of recruitment process in Chennai-representative sample and slum-based sample**

| # Households listed           | Households screened | # Individuals screened | # Individuals eligible based on symptom screener | # Individuals enrolled (with completed survey) | # enrolled TB presumptives | # enrolled TB pre-presumptives |
|-------------------------------|---------------------|------------------------|--------------------------------------------------|------------------------------------------------|----------------------------|--------------------------------|
| Chennai-representative sample | 49401               | 49401                  | 705                                              | 533                                            | 383                        | 150                            |
| Slum-based sample             | 35224               | 85600                  | 1217                                             | 1134                                           | 597                        | 537                            |
| Overall                       | 84625               | 135001                 | 1922                                             | 1667                                           | 980                        | 687                            |

### **Supplement 4: Results tables for logistic regression models**

We performed a series of multivariate logistic regressions were performed to identify characteristics that were associated with a higher likelihood of having sought care from a government or private doctor at the time of the initial interview. Results from each regression are reported below. We report the odds ratio, upper and lower bounds of the 95% confidence interval for the odds ratio, and p-value. Full descriptions of variables can be found in Supplement 1.

**a. Model 1:** Predictors of care seeking from the “general” logistic regression which included data from all surveyed participants (n = 1667).

| Variable                                              | Odds Ratio | Lower CI | Upper CI | p-value      | Category        |
|-------------------------------------------------------|------------|----------|----------|--------------|-----------------|
| Gender: male                                          | 1.72       | 1.22     | 2.43     | <b>0.002</b> | Demographics    |
| Job: retired/unemployed/disabled vs. homemaker        | 1.29       | 0.87     | 1.92     | 0.202        | Demographics    |
| Age*                                                  | 1.20       | 1.04     | 1.38     | <b>0.012</b> | Demographics    |
| Caste: SC/ST vs. refused                              | 1.17       | 0.68     | 1.99     | 0.572        | Demographics    |
| Caste: none of the above vs. refused                  | 1.15       | 0.66     | 2.01     | 0.618        | Demographics    |
| Religion: Hindu vs. Christian                         | 1.15       | 0.83     | 1.59     | 0.387        | Demographics    |
| Literate                                              | 1.14       | 0.87     | 1.51     | 0.343        | Demographics    |
| Religion: Muslim/other vs. Christian                  | 1.10       | 0.68     | 1.77     | 0.699        | Demographics    |
| Wealth score*                                         | 0.99       | 0.88     | 1.10     | 0.831        | Demographics    |
| Years of education*                                   | 0.99       | 0.86     | 1.14     | 0.851        | Demographics    |
| Caste: OBC vs. refused                                | 0.95       | 0.55     | 1.63     | 0.858        | Demographics    |
| Job: other vs. homemaker                              | 0.74       | 0.51     | 1.09     | 0.130        | Demographics    |
| Sample: Original Chennai-representative               | 0.74       | 0.58     | 0.93     | <b>0.010</b> | Demographics    |
| Job: laborer vs. homemaker                            | 0.74       | 0.53     | 1.03     | 0.072        | Demographics    |
| Job: professional vs. homemaker                       | 0.58       | 0.39     | 0.87     | <b>0.008</b> | Demographics    |
| Get health info from doctor                           | 1.43       | 1.02     | 2.01     | <b>0.038</b> | General drivers |
| Pre-existing illness                                  | 1.28       | 1.02     | 1.61     | <b>0.035</b> | General drivers |
| Value good health*                                    | 1.19       | 1.07     | 1.33     | <b>0.001</b> | General drivers |
| Facility preference: private vs. government           | 1.18       | 0.92     | 1.50     | 0.197        | General drivers |
| Worry about transportation cost*                      | 1.17       | 1.02     | 1.34     | <b>0.021</b> | General drivers |
| Get health info from govt                             | 1.16       | 0.91     | 1.49     | 0.233        | General drivers |
| Other disease knowledge*                              | 1.12       | 0.98     | 1.28     | 0.111        | General drivers |
| Relative with pre-existing illness                    | 1.08       | 0.85     | 1.38     | 0.510        | General drivers |
| Level of perceived family/community care when sick*   | 1.07       | 0.95     | 1.22     | 0.282        | General drivers |
| Worry about healthcare cost*                          | 1.07       | 0.94     | 1.21     | 0.313        | General drivers |
| Perceived number of people who help with obligations* | 1.03       | 0.92     | 1.16     | 0.574        | General drivers |
| General financial stress*                             | 1.01       | 0.88     | 1.15     | 0.917        | General drivers |
| Tendency to delay gratification*                      | 0.95       | 0.85     | 1.06     | 0.341        | General drivers |

|                                                   |      |      |      |              |                     |
|---------------------------------------------------|------|------|------|--------------|---------------------|
| Family push to seek care*                         | 0.94 | 0.84 | 1.06 | 0.343        | General drivers     |
| Get health info from community*                   | 0.94 | 0.83 | 1.07 | 0.351        | General drivers     |
| Get health info from media*                       | 0.89 | 0.78 | 1.01 | 0.062        | General drivers     |
| Get enough sleep                                  | 0.78 | 0.63 | 0.98 | <b>0.029</b> | General drivers     |
| Exercise                                          | 0.69 | 0.52 | 0.92 | <b>0.012</b> | General drivers     |
| Facility preference: no difference vs. government | 0.66 | 0.48 | 0.90 | <b>0.010</b> | General drivers     |
| Smoker                                            | 0.60 | 0.41 | 0.87 | <b>0.007</b> | General drivers     |
| Facility preference mismatch w/ community         | 0.54 | 0.40 | 0.73 | <b>0.000</b> | General drivers     |
| Problem drinker                                   | 0.53 | 0.35 | 0.80 | <b>0.002</b> | General drivers     |
| Aware of TB                                       | 0.98 | 0.68 | 1.41 | 0.919        | TB-specific drivers |

\*Continuous variables are scaled so that the odds ratio reflects the impact of one standard deviation increase in the variable.

- b. Model 2:** Impact of TB belief and information predictors on odds of seeking formal care from a doctor for symptoms associated with tuberculosis. Model includes data from all surveyed participants with TB-indicative symptoms who had heard of TB (n = 1427).

| Variable                                       | Odds Ratio | Lower CI | Upper CI | p-value      | Category            |
|------------------------------------------------|------------|----------|----------|--------------|---------------------|
| Religion: Hindu vs. Christian                  | 1.35       | 0.96     | 1.89     | 0.084        | Demographics        |
| Religion: Muslim/other vs. Christian           | 1.24       | 0.76     | 2.03     | 0.396        | Demographics        |
| Age*                                           | 1.19       | 1.04     | 1.36     | <b>0.013</b> | Demographics        |
| Caste: SC/ST vs. refused                       | 1.15       | 0.64     | 2.06     | 0.637        | Demographics        |
| Job: retired/unemployed/disabled vs. homemaker | 1.12       | 0.75     | 1.71     | 0.582        | Demographics        |
| Literate                                       | 1.09       | 0.81     | 1.46     | 0.582        | Demographics        |
| Gender: male                                   | 1.07       | 0.79     | 1.46     | 0.646        | Demographics        |
| Caste: none of the above vs. refused           | 1.02       | 0.56     | 1.87     | 0.938        | Demographics        |
| Wealth score*                                  | 1.01       | 0.90     | 1.13     | 0.866        | Demographics        |
| Years of education*                            | 1.00       | 0.87     | 1.15     | 0.981        | Demographics        |
| Caste: OBC vs. refused                         | 0.97       | 0.54     | 1.73     | 0.914        | Demographics        |
| Sample: Original Chennai-representative        | 0.68       | 0.54     | 0.87     | <b>0.002</b> | Demographics        |
| Job: other vs. homemaker                       | 0.62       | 0.42     | 0.92     | <b>0.016</b> | Demographics        |
| Job: laborer vs. homemaker                     | 0.60       | 0.43     | 0.85     | <b>0.004</b> | Demographics        |
| Job: professional vs. homemaker                | 0.52       | 0.35     | 0.78     | <b>0.002</b> | Demographics        |
| Believe nearby facility tests for TB           | 1.17       | 0.90     | 1.51     | 0.241        | TB-specific drivers |
| Believe more likely to get TB than community   | 1.13       | 1.01     | 1.26     | <b>0.039</b> | TB-specific drivers |
| Know free TB treatment exists                  | 1.06       | 0.81     | 1.39     | 0.670        | TB-specific drivers |
| Perceived TB stigma                            | 0.94       | 0.84     | 1.05     | 0.249        | TB-specific drivers |
| Believe TB is curable                          | 0.92       | 0.72     | 1.17     | 0.503        | TB-specific drivers |
| Perceived % in community who will get TB*      | 0.84       | 0.75     | 0.94     | <b>0.003</b> | TB-specific drivers |

\*Continuous variables are scaled so that the odds ratio reflects the impact of one standard deviation increase in the variable.

- c. Model 3:** Impact of symptom characteristics predictors on odds of seeking formal care from a doctor for symptoms associated with tuberculosis. In order to prevent confounding due to the different symptom enrollment criteria used in the two samples, this regression included data only from respondents with TB-indicative symptoms in the slum-based sample (n = 1134).

| Variable                                       | Odds Ratio | Lower CI | Upper CI | p-value      | Category                 |
|------------------------------------------------|------------|----------|----------|--------------|--------------------------|
| Caste: SC/ST vs. refused                       | 1.76       | 0.70     | 4.31     | 0.219        | Demographics             |
| Religion: Muslim/other vs. Christian           | 1.42       | 0.79     | 2.55     | 0.238        | Demographics             |
| Caste: OBC vs. refused                         | 1.36       | 0.54     | 3.35     | 0.502        | Demographics             |
| Caste: none of the above vs. refused           | 1.32       | 0.52     | 3.31     | 0.555        | Demographics             |
| Literate                                       | 1.30       | 0.93     | 1.82     | 0.121        | Demographics             |
| Age*                                           | 1.22       | 1.04     | 1.43     | <b>0.013</b> | Demographics             |
| Years of education*                            | 1.14       | 0.97     | 1.35     | 0.110        | Demographics             |
| Religion: Hindu vs. Christian                  | 1.04       | 0.71     | 1.52     | 0.851        | Demographics             |
| Job: retired/unemployed/disabled vs. homemaker | 0.96       | 0.61     | 1.53     | 0.876        | Demographics             |
| Wealth score*                                  | 0.94       | 0.83     | 1.07     | 0.358        | Demographics             |
| Gender: male                                   | 0.81       | 0.57     | 1.15     | 0.246        | Demographics             |
| Job: other vs. homemaker                       | 0.69       | 0.43     | 1.11     | 0.122        | Demographics             |
| Job: laborer vs. homemaker                     | 0.61       | 0.41     | 0.90     | <b>0.012</b> | Demographics             |
| Job: professional vs. homemaker                | 0.60       | 0.37     | 0.97     | <b>0.035</b> | Demographics             |
| Symptom days*                                  | 1.59       | 1.37     | 1.85     | <b>0.000</b> | Symptom-specific drivers |
| Symptom count*                                 | 1.28       | 1.12     | 1.48     | <b>0.000</b> | Symptom-specific drivers |
| Symptom recurrence score*                      | 0.87       | 0.76     | 0.99     | <b>0.029</b> | Symptom-specific drivers |

\*Continuous variables are scaled so that the odds ratio reflects the impact of one standard deviation increase in the variable.
